# Supplementary material for: N-Methyl-D-aspartate (NMDA) and cannabinoid CB2 receptors form functional complexes in cells of the central nervous system: insights into the therapeutic potential of neuronal and microglial NMDA receptors
Source: PubMed Central journal article supplement (PMC8576920; doi:10.1186/s13195-021-00920-6), 2021-11-08
Supplement: 13195_2021_920_MOESM1_ESM.pdf [file 13195_2021_920_MOESM1_ESM.pdf]

## Supplementary information

**N-Methyl-D-Aspartate (NMDA) and cannabinoid CB<sub>2</sub> receptors form functional complexes in cells of the nervous system. Insights into the therapeutic potential of neuronal and microglial NMDA receptors.**

**Running title. Cannabinoid-NMDA receptor interactions**

Rafael Rivas-Santisteban<sup>1,2</sup>, Alejandro Lillo<sup>3,4</sup>, Jaume Lillo<sup>1,2</sup>, Joan-Biel Rebassa<sup>4</sup>, Joan S. Contestí<sup>4</sup>, Carlos A. Saura<sup>1,3</sup>, Rafael Franco<sup>1,2,5\*</sup>, Gemma Navarro<sup>1,3,4\*</sup>

### Affiliations:

<sup>1</sup> Centro de Investigación Biomédica en Red sobre Enfermedades Neurodegenerativas, Instituto de Salud Carlos III, Valderrebollo, 5, 28031 Madrid, Spain; carlos.saura@uab.cat

<sup>2</sup> Departament de Bioquímica i Biomedicina Molecular, Universitat de Barcelona, 08028 Barcelona, Spain

<sup>3</sup> Institut de Neurociències, Departament de Bioquímica i Biologia Molecular, Universitat Autònoma de Barcelona, Bellaterra, 08193 Barcelona, Spain

<sup>4</sup> Department of Biochemistry and Physiology, Faculty of Pharmacy and Food Science, University of Barcelona, Barcelona, Spain

<sup>5</sup> School of Chemistry. University of Barcelona, Barcelona, Spain.

### \*Corresponding authors:

Rafael Franco ([rfranco123@gmail.com](mailto:rfranco123@gmail.com); [rfranco@ub.edu](mailto:rfranco@ub.edu))  
School of Biology. Universitat de Barcelona.  
Diagonal 643. Prevosti Building.  
Barcelona 08028. Spain  
Tel +34 934021208

Gemma Navarro ([g.navarro@ub.edu](mailto:g.navarro@ub.edu))  
School of Pharmacy. Universitat de Barcelona  
Joan XXIII, 29-31  
Barcelona 08028. Spain  
Tel +34 934034500

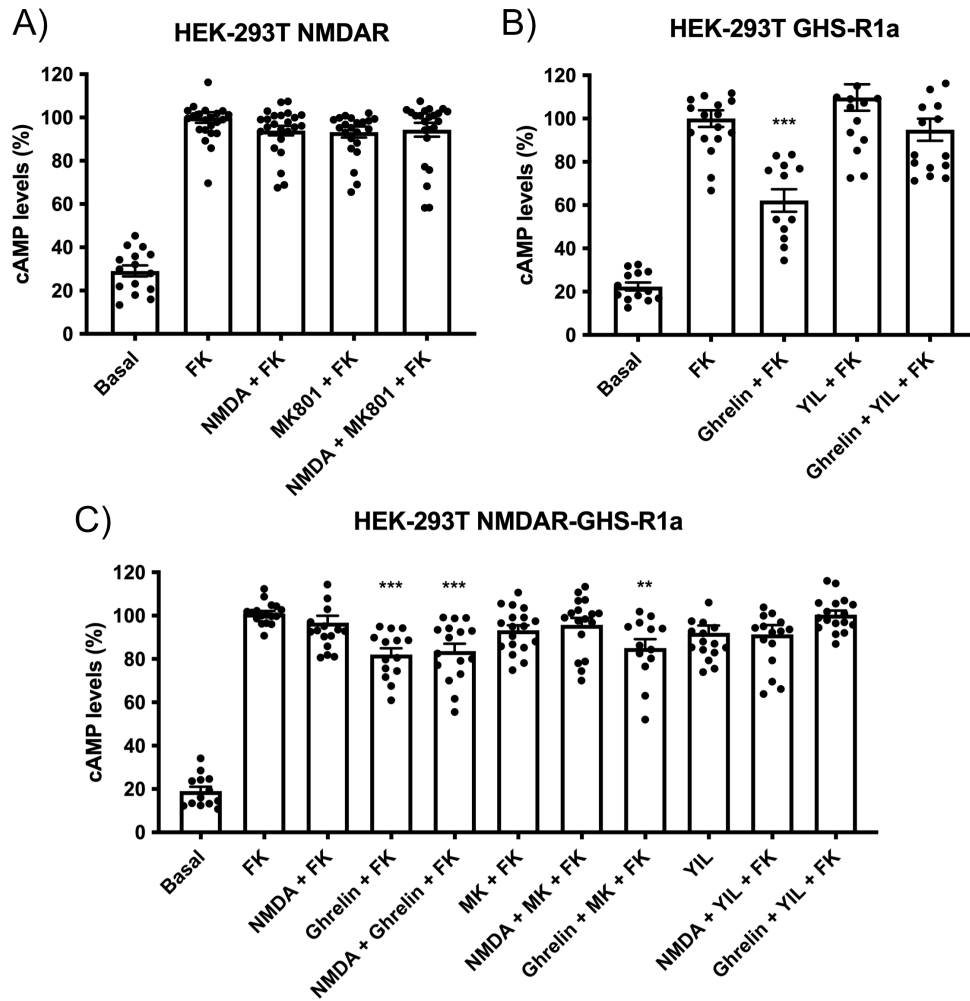

**Supplementary figure 1. Signaling in HEK-293T cells expressing NMDA and GHSR1a receptors.** HEK-293T cells transfected with the cDNAs for two protomers of the NMDA receptor: GluN1 (1  $\mu$ g) and GluN2B (0.75  $\mu$ g) and/or with the cDNA for the GHS-R1a (1  $\mu$ g), were treated with selective agonists (15  $\mu$ M NMDA for NMDAR and/or 100 nM Ghrelin for GHS-R1a). When indicated cells were pretreated with selective receptor antagonists (1  $\mu$ M MK-801 for NMDA or 1  $\mu$ M YIL-781 for GHS-R1a). Panels A-C: Intracellular cAMP levels were determined by TR-FRET as described in Methods. As  $G_i$  coupling was assessed, decreases in cAMP levels were determined in cells previously treated with 0.5  $\mu$ M forskolin (15 min). Values are the mean  $\pm$  S.E.M. of 3 independent experiments performed in triplicates. ANOVA Summary: Panel A; F: 90.94,  $p < 0.001$ , Panel B; F: 52.09,  $p < 0.001$  and Panel C; F: 49.64,  $p < 0.001$ .
